# Supplementary material for: Differential regulation of Effector and Regulatory T cell function by Blimp1
Source: PubMed Central journal article supplement (PMC5608714; doi:10.1038/s41598-017-12171-3), 2017-09-21
Supplement: 41598_2017_12171_MOESM1_ESM.pdf [file 41598_2017_12171_MOESM1_ESM.pdf]

## **Supplementary information**

### **Differential regulation of Effector and Regulatory T cell function by Blimp1**

Rashmi Bankot\*, Chihiro Ogawa\* Truc Nguyen, Lena Emadi, Michael Couse, Soofia Salehi, Xuemo Fan, Deepti Dhall, Yizhou Wang, Jordan Brown, Vincent Funari, Jie Tang, and Gislaine A. Martins

\*These authors contributed equally to this work.

# SUPPLEMENTARY FIGURE 1

**A**

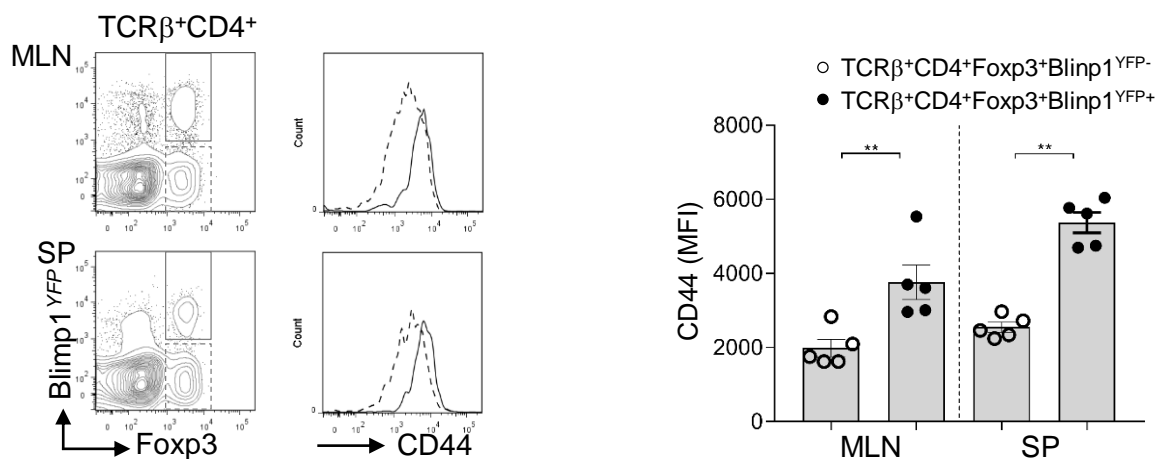

**B**

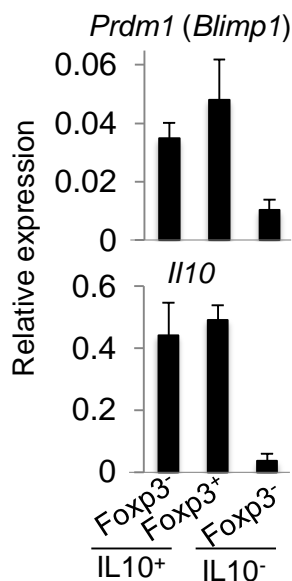

**Blimp-1 expression in Treg and Teff cells (A)** Left, Histograms show CD44 expression in TCRβ+CD4+Foxp3+Blimp<sup>YFP+</sup> (gate showed in left side FACS plot, solid line) and TCRβ+CD4+Foxp3+Blimp<sup>YFP-</sup> (dashed line) in MLN and SP. Right, bar graph shows average percentage ± SEM of MFI of CD44<sup>+</sup> cells in TCRβ+CD4+Foxp3+Blimp<sup>YFP+</sup> (filled circles) and TCRβ+CD4+Foxp3+Blimp<sup>YFP-</sup> (open circles) cells in MLN and SP. Each symbol represents one mouse and N=5. **(B)** qRT-PCR analysis of *Prdm1* and *Il10* mRNA in sorted CD4+Foxp3<sup>GFP-</sup>IL10<sup>+</sup> (Tr1), total Foxp3<sup>GFP+</sup> and Foxp3<sup>GFP-</sup>IL10<sup>-</sup>CD4<sup>+</sup> T cells from IL10 10Bit-Foxp3<sup>GFP</sup> mice. (N=3 mice/group). \**P*<0.05, \*\**P*<0.01, paired *t*-test.

## SUPPLEMENTARY FIGURE 2

**A**

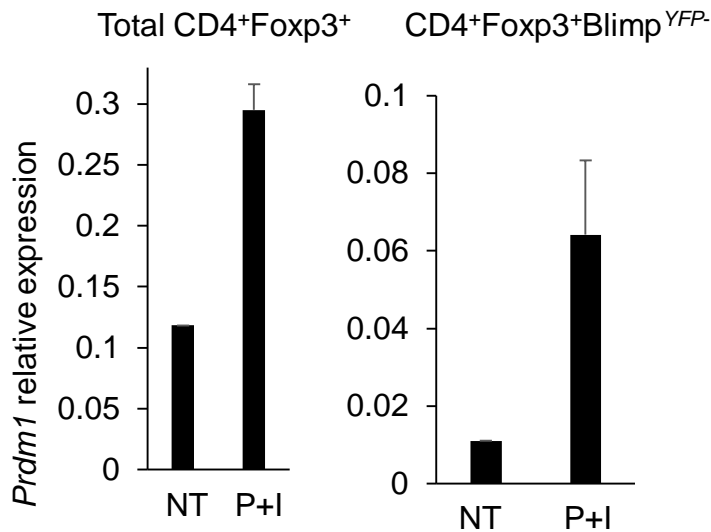

**B**

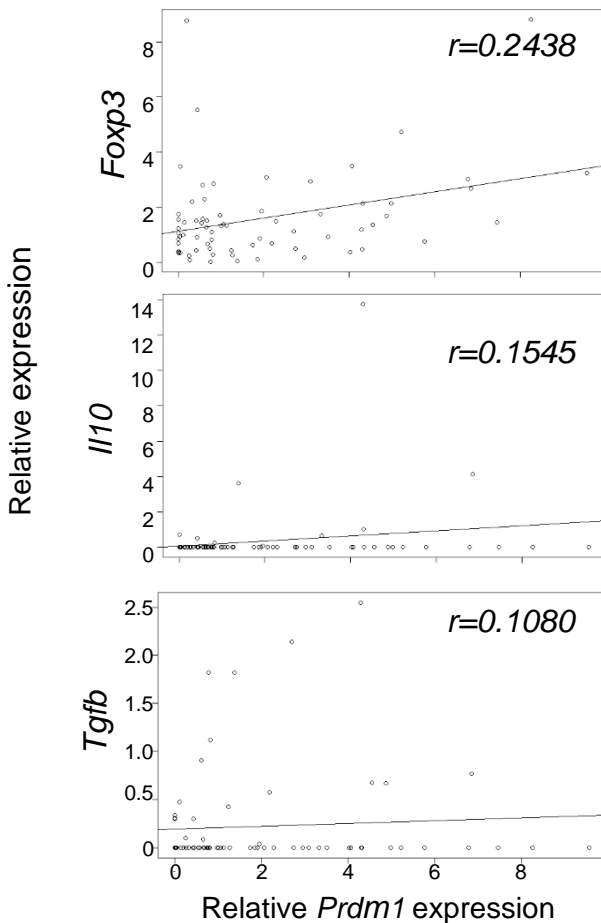

**Blimp1 expression is induced upon TCR stimulation in Foxp3<sup>+</sup> Treg cells but does not correlate with cytokine expression.** (A) Graphs showing relative expression of *Prdm1* (*Blimp1*) by qRT-PCR in bulk sorted total (CD4<sup>+</sup> Foxp3<sup>+</sup>) and Blimp<sup>YFP-</sup> (Foxp3<sup>+</sup>Blimp1<sup>YFP-</sup>) Treg cells before (NT) and after in vitro TCR stimulation (4hours, PMA and ionomycin, P+I). (B) Graphs showing correlation of *Prdm1* and *Foxp3* (top), *Il10* (middle) or *Tgfb* (bottom) expression in CD4<sup>+</sup>CD25<sup>high</sup>T cells. Regression line is presented in each graph. Each symbol represents one cell.

**SUPPLEMENTARY FIGURE 3**

**A**

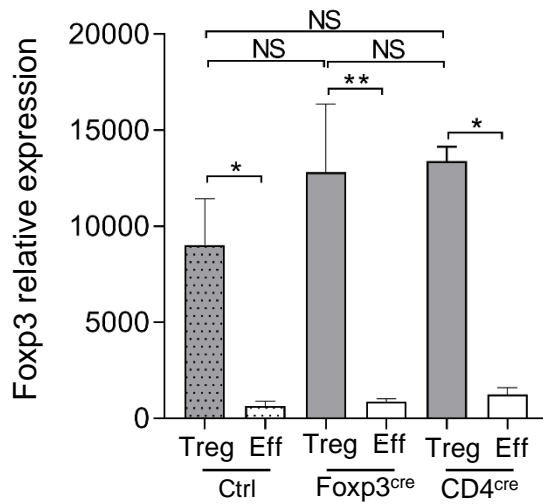

**B**

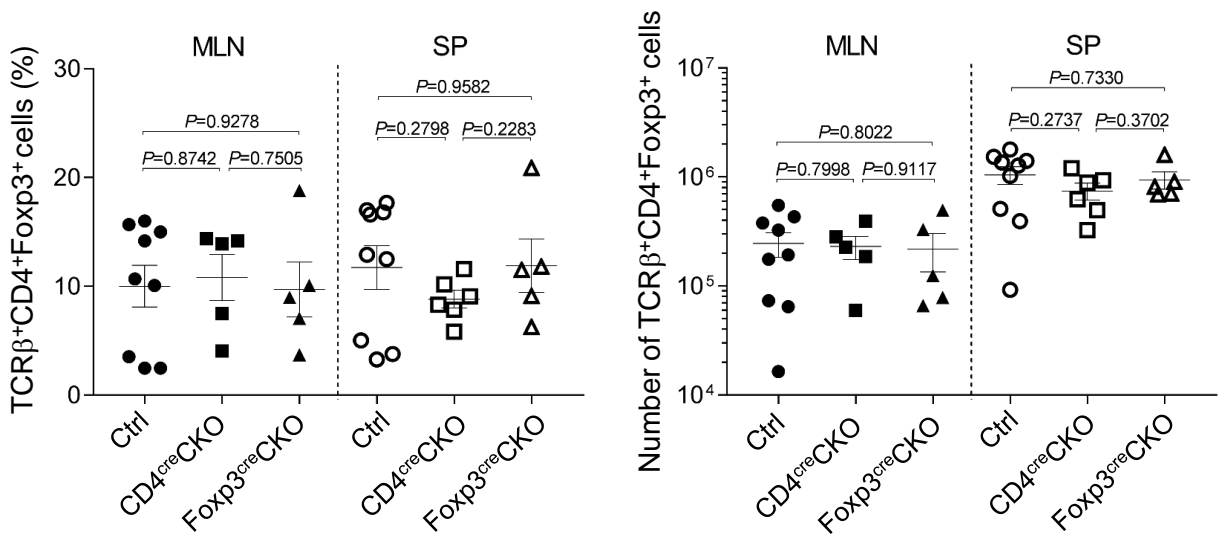

**CD4 or Foxp3-driven CRE expression does not alter Fxp3 expression or Fxp3<sup>+</sup> cell numbers.** (A) Expression of Fxp3 mRNA (qRT-PCR, relative to b2Microglobulin) in sorted Treg (CD4<sup>+</sup> Fxp3<sup>+</sup>) and Teff (CD4<sup>+</sup> Fxp3<sup>-</sup> CD44<sup>high</sup>) cells from control (*Prdm1*<sup>+/+</sup>), FOXP3<sup>CRE</sup> CKO (*Prdm1*<sup>F/F</sup> Foxp3<sup>cre</sup>), and CD4<sup>cre</sup>CKO (*Prdm1*<sup>F/F</sup> CD4<sup>cre</sup>) mice. (B) Scatter plots showing the frequency (left) and absolute numbers (right) of TCRβ<sup>+</sup>CD4<sup>+</sup>Fxp3<sup>+</sup> cells in the mesenteric lymph nodes (MLN) and spleen (SP) from control (Ctrl) and Blimp1 CKO (CD4<sup>cre</sup>CKO or Foxp3<sup>cre</sup>CKO) mice. N≥5 mice/group. Bars indicate average ± SEM. P-values were calculated by one-way ANOVA.

## SUPPLEMENTARY FIGURE 4

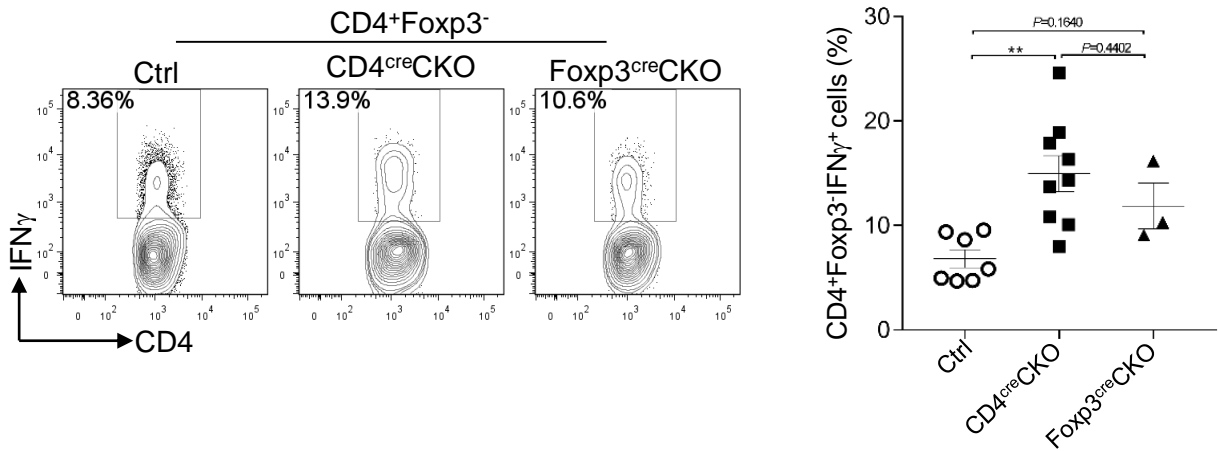

**Foxp3<sup>+</sup>Treg cell-specific deletion of Blimp1 does not alter IFN $\gamma$  production in CD4<sup>+</sup>Teff cells.** FACS plots (left) and scatter plots (right) showing the frequency of IFN $\gamma$ <sup>+</sup>CD4<sup>+</sup>Foxp3<sup>-</sup> cells in spleen cells of control (Ctrl) and Blimp1 CKO (CD4<sup>cre</sup>CKO or Foxp3<sup>cre</sup>CKO) mice. Cells were stimulated with anti-CD3 and antiCD28 for 24 hours (BFA added in the last 6 hours) prior to staining and analysis. Scatter plot (right): Each symbol represents one mouse (N $\geq$ 3 mice/group). Bars indicate average  $\pm$  SEM. \*\**P*<0.01, one-way ANOVA.

**SUPPLEMENTARY TABLE 1. List of Differentially expressed (DE) genes.** DE genes (1.5-fold at  $P < 0.05$ ) in pTreg and Teff cells (CD4<sup>cre</sup>CKO versus Ctrl) generated from Ctrl and CD4<sup>cre</sup>CKO CD4<sup>+</sup> naive T cells co-injected into RAG1<sup>-/-</sup> mice and submitted to mRNA microarray analysis.

| Gene     | Up/Down_pTreg                     |        | Gene          | log2FC<br>(KO_pTreg/W<br>T_pTreg) | pvalue |
|----------|-----------------------------------|--------|---------------|-----------------------------------|--------|
|          | log2FC<br>(KO_pTreg/WT_<br>pTreg) | pvalue |               |                                   |        |
| Ccr6     | 2.520919234                       | 0.0141 | Cxcr3         | 0.923256362                       | 0.0260 |
| Pdlim1   | 2.273355608                       | 0.0000 | Ece1          | 0.918057313                       | 0.0056 |
| Msc      | 2.220397777                       | 0.0018 | Cxcr5         | 0.908289177                       | 0.0092 |
| Pou2af1  | 2.049579392                       | 0.0003 | Kcnn4         | 0.893542811                       | 0.0342 |
| Crtam    | 1.947450066                       | 0.0073 | Ccdc50        | 0.885353084                       | 0.0001 |
| Idi2     | 1.863956018                       | 0.0005 | Capn5         | 0.871089256                       | 0.0010 |
| Il17f    | 1.794787661                       | 0.0031 | Ankrd46       | 0.86157782                        | 0.0054 |
| Gypc     | 1.636661509                       | 0.0000 | Kras          | 0.858361977                       | 0.0015 |
| Xcl1     | 1.624664511                       | 0.0022 | Stat4         | 0.851729084                       | 0.0018 |
| Erc6l2   | 1.521558802                       | 0.0001 | Jazf1         | 0.847377688                       | 0.0364 |
| Dnase1l3 | 1.490428516                       | 0.0045 | Cep85         | 0.82999805                        | 0.0001 |
| Slamf7   | 1.436890232                       | 0.0026 | D030056L22Rik | 0.82242731                        | 0.0008 |
| Tespa1   | 1.41708856                        | 0.0001 | Pax1          | 0.806027649                       | 0.0117 |
| Itga3    | 1.407333133                       | 0.0156 | Adh4          | 0.799159123                       | 0.0025 |
| Cd160    | 1.352369287                       | 0.0308 | Unc13b        | 0.788993399                       | 0.0415 |
| Bdh2     | 1.261551864                       | 0.0000 | Arl6          | 0.777257241                       | 0.0011 |
| Hif1a    | 1.253909991                       | 0.0002 | Txnrd3        | 0.768740902                       | 0.0001 |
| Gls2     | 1.250897919                       | 0.0323 | Slc16a6       | 0.766421394                       | 0.0002 |
| Ssx2ip   | 1.248955297                       | 0.0000 | Lrmp          | 0.765402822                       | 0.0227 |
| Sema4f   | 1.236165115                       | 0.0004 | Rbbp7         | 0.762115907                       | 0.0333 |
| Sigirr   | 1.231406647                       | 0.0049 | Bcl2          | 0.761068908                       | 0.0000 |
| Dnph1    | 1.227720571                       | 0.0006 | Ptk2          | 0.758203054                       | 0.0383 |
| Gstt1    | 1.13772866                        | 0.0130 | Zdhhc13       | 0.755337823                       | 0.0002 |
| Tnfsf14  | 1.134561079                       | 0.0252 | Wisp1         | 0.75261012                        | 0.0037 |
| Lta      | 1.120098533                       | 0.0007 | Pgam1         | 0.752045434                       | 0.0002 |
| Impa2    | 1.119343245                       | 0.0097 | Zfp202        | 0.748903283                       | 0.0019 |
| Gstt3    | 1.113026745                       | 0.0155 | Crip2         | 0.74630009                        | 0.0043 |
| Gnai1    | 1.112370983                       | 0.0010 | Slc29a3       | 0.742670565                       | 0.0165 |
| Tnfsf11  | 1.077909679                       | 0.0012 | Tpi1          | 0.729284155                       | 0.0263 |
| Pafah1b3 | 1.056963661                       | 0.0003 | Tmem41a       | 0.726381025                       | 0.0143 |
| Egr4     | 1.047859531                       | 0.0465 | Utf1          | 0.720474045                       | 0.0196 |
| Spsb1    | 1.02004449                        | 0.0245 | 1110038B12Rik | 0.720236036                       | 0.0193 |
| Clec2i   | 1.015977728                       | 0.0273 | Plac8         | 0.719005765                       | 0.0386 |
| Tnfrsf26 | 1.002719996                       | 0.0076 | Sdf4          | 0.716346108                       | 0.0022 |
| Rhbdf1   | 0.987815584                       | 0.0279 | Tg            | 0.713552254                       | 0.0018 |
| Gspt2    | 0.984331923                       | 0.0003 | Ggt7          | 0.712584294                       | 0.0054 |
| Gramd1b  | 0.968992393                       | 0.0070 | Zfp280b       | 0.711268672                       | 0.0156 |
| Tcf7     | 0.960015545                       | 0.0003 | Ptprk         | 0.706691942                       | 0.0349 |
|          |                                   |        | Hvcn1         | 0.705710168                       | 0.0218 |
|          |                                   |        | Preli2        | 0.70017582                        | 0.0097 |
|          |                                   |        | Pus7l         | 0.696389705                       | 0.0079 |
|          |                                   |        | Tmem216       | 0.693784923                       | 0.0080 |

|                      |              |        |
|----------------------|--------------|--------|
| <b>Cdon</b>          | 0.68891227   | 0.0061 |
| <b>2310001H17Rik</b> | 0.688070435  | 0.0187 |
| <b>Pdzk1</b>         | 0.684307044  | 0.0049 |
| <b>Xpot</b>          | 0.680222684  | 0.0269 |
| <b>Zfp940</b>        | 0.678521027  | 0.0008 |
| <b>Krt17</b>         | 0.662150809  | 0.0221 |
| <b>Anp32a</b>        | 0.660326989  | 0.0016 |
| <b>Trps1</b>         | 0.657515751  | 0.0166 |
| <b>Sccpdh</b>        | 0.654549408  | 0.0020 |
| <b>Ccdc64</b>        | 0.651771459  | 0.0231 |
| <b>Tmed4</b>         | 0.644714636  | 0.0160 |
| <b>Wrb</b>           | 0.644040647  | 0.0103 |
| <b>Nudt5</b>         | 0.642985532  | 0.0240 |
| <b>Ttc27</b>         | 0.638604467  | 0.0051 |
| <b>Cd320</b>         | 0.631470764  | 0.0092 |
| <b>Abca3</b>         | 0.619945219  | 0.0055 |
| <b>Serpind1</b>      | 0.613884693  | 0.0446 |
| <b>Rcan1</b>         | 0.612675005  | 0.0103 |
| <b>Il11</b>          | 0.610745451  | 0.0029 |
| <b>Tspan2</b>        | 0.609770854  | 0.0106 |
| <b>Itpr1</b>         | 0.609407357  | 0.0281 |
| <b>Tspan3</b>        | 0.608915137  | 0.0054 |
| <b>Slc24a3</b>       | 0.608579103  | 0.0402 |
| <b>Trpm6</b>         | 0.607082471  | 0.0040 |
| <b>Acaca</b>         | 0.603891458  | 0.0056 |
| <b>Hspd1</b>         | 0.600697468  | 0.0036 |
| <b>Mid2</b>          | 0.598074879  | 0.0021 |
| <b>0610037L13Rik</b> | 0.595253542  | 0.0151 |
| <b>Snhg5</b>         | 0.593638313  | 0.0003 |
| <b>Fam69b</b>        | 0.590580045  | 0.0027 |
| <b>Ybx3</b>          | 0.587527173  | 0.0010 |
| <b>Als2</b>          | 0.585691642  | 0.0093 |
| <b>Irf1</b>          | -0.585076974 | 0.0016 |
| <b>Parp14</b>        | -0.587108183 | 0.0004 |
| <b>Sh3bgrl3</b>      | -0.589111206 | 0.0117 |
| <b>Capg</b>          | -0.590601888 | 0.0481 |
| <b>Neur13</b>        | -0.591404438 | 0.0049 |
| <b>Sash3</b>         | -0.593500551 | 0.0158 |
| <b>Ubl3</b>          | -0.593632561 | 0.0007 |
| <b>Dctn6</b>         | -0.59368767  | 0.0076 |
| <b>Tnfrsf4</b>       | -0.594253288 | 0.0031 |
| <b>Ly6a</b>          | -0.596764506 | 0.0085 |
| <b>F2rl2</b>         | -0.599186669 | 0.0070 |

|                      |              |        |
|----------------------|--------------|--------|
| <b>Rab4b</b>         | -0.601522963 | 0.0003 |
| <b>Coro1a</b>        | -0.603454273 | 0.0150 |
| <b>Fam177a</b>       | -0.603726894 | 0.0407 |
| <b>Map4k2</b>        | -0.60448233  | 0.0004 |
| <b>Stk38l</b>        | -0.605170484 | 0.0032 |
| <b>Tor4a</b>         | -0.608702599 | 0.0117 |
| <b>Cryba4</b>        | -0.611502727 | 0.0117 |
| <b>Oaz2</b>          | -0.612393257 | 0.0008 |
| <b>4632428N05Rik</b> | -0.613260283 | 0.0219 |
| <b>Egr1</b>          | -0.613370611 | 0.0498 |
| <b>Grb7</b>          | -0.615017239 | 0.0104 |
| <b>Ppm1l</b>         | -0.618120832 | 0.0153 |
| <b>Jun</b>           | -0.619222454 | 0.0347 |
| <b>Zfp281</b>        | -0.619981476 | 0.0203 |
| <b>Fli1</b>          | -0.621015115 | 0.0057 |
| <b>Tspan14</b>       | -0.621233385 | 0.0073 |
| <b>Plekho2</b>       | -0.624023499 | 0.0247 |
| <b>Arrdc4</b>        | -0.624216062 | 0.0399 |
| <b>Ppp1r12a</b>      | -0.624377812 | 0.0367 |
| <b>Zmynd8</b>        | -0.6256919   | 0.0107 |
| <b>Armc7</b>         | -0.628397526 | 0.0347 |
| <b>Ikzf4</b>         | -0.629169147 | 0.0113 |
| <b>Samsn1</b>        | -0.630887968 | 0.0101 |
| <b>Apaf1</b>         | -0.634243863 | 0.0217 |
| <b>Slc9a3r1</b>      | -0.635494307 | 0.0017 |
| <b>Mif4gd</b>        | -0.638467848 | 0.0183 |
| <b>Snx20</b>         | -0.641606582 | 0.0122 |
| <b>Sorl1</b>         | -0.641715352 | 0.0063 |
| <b>Foxj2</b>         | -0.643976935 | 0.0113 |
| <b>Kmt2a</b>         | -0.645931795 | 0.0080 |
| <b>Cggbp1</b>        | -0.646219223 | 0.0079 |
| <b>Ddit3</b>         | -0.646354393 | 0.0032 |
| <b>Icos</b>          | -0.647691685 | 0.0219 |
| <b>Arhgap18</b>      | -0.650046033 | 0.0292 |
| <b>Agfg1</b>         | -0.654665642 | 0.0076 |
| <b>Ak7</b>           | -0.656181329 | 0.0201 |
| <b>Tbx21</b>         | -0.656652127 | 0.0301 |
| <b>Commd3</b>        | -0.656725294 | 0.0094 |
| <b>Cyth1</b>         | -0.65780697  | 0.0079 |
| <b>Eci2</b>          | -0.658905414 | 0.0015 |
| <b>3300005D01Rik</b> | -0.662142307 | 0.0339 |
| <b>Vopp1</b>         | -0.664491959 | 0.0003 |
| <b>Gng12</b>         | -0.665226369 | 0.0021 |

|                |              |        |                   |              |        |
|----------------|--------------|--------|-------------------|--------------|--------|
| <b>Lst1</b>    | -0.669555418 | 0.0136 | <b>Lyrn5</b>      | -0.753095049 | 0.0000 |
| <b>Trex1</b>   | -0.669653835 | 0.0068 | <b>Jakmip1</b>    | -0.75387727  | 0.0000 |
| <b>Zfp263</b>  | -0.671406486 | 0.0063 | <b>Pglyrp1</b>    | -0.762341864 | 0.0189 |
| <b>Ppp1r3f</b> | -0.676308023 | 0.0107 | <b>Irak3</b>      | -0.763465674 | 0.0279 |
| <b>Cd53</b>    | -0.676955513 | 0.0111 | <b>Aes</b>        | -0.765956687 | 0.0002 |
| <b>Klc3</b>    | -0.678412845 | 0.0031 | <b>Dtx1</b>       | -0.766604237 | 0.0069 |
| <b>Ccs</b>     | -0.678767096 | 0.0492 | <b>Rasal3</b>     | -0.770531704 | 0.0004 |
| <b>S100a10</b> | -0.680524775 | 0.0464 | <b>Ebpl</b>       | -0.772263856 | 0.0129 |
| <b>Pigx</b>    | -0.683971636 | 0.0362 | <b>Hexa</b>       | -0.773257869 | 0.0048 |
| <b>Acsbg1</b>  | -0.686581561 | 0.0385 | <b>Stk17b</b>     | -0.774665861 | 0.0080 |
| <b>Irgm2</b>   | -0.687411307 | 0.0020 | <b>Gpr146</b>     | -0.774873737 | 0.0004 |
| <b>Folr4</b>   | -0.688273953 | 0.0050 | <b>Atf7ip</b>     | -0.778440597 | 0.0259 |
| <b>Lasp1</b>   | -0.689524587 | 0.0079 | <b>Nck2</b>       | -0.779290082 | 0.0049 |
| <b>Myo1g</b>   | -0.694030235 | 0.0227 | <b>Rab32</b>      | -0.78262     | 0.0016 |
| <b>Txnip</b>   | -0.696763321 | 0.0074 | <b>Mta3</b>       | -0.789378396 | 0.0018 |
| <b>Ehd1</b>    | -0.699656526 | 0.0028 | <b>Src</b>        | -0.790023207 | 0.0074 |
| <b>Cdkn1a</b>  | -0.705926343 | 0.0189 | <b>Jak1</b>       | -0.79193387  | 0.0116 |
| <b>Abi3</b>    | -0.706682188 | 0.0053 | <b>Pdgfb</b>      | -0.797587855 | 0.0181 |
| <b>Samd9l</b>  | -0.708605026 | 0.0005 | <b>2210408F21</b> |              |        |
| <b>Smim14</b>  | -0.711025506 | 0.0007 | <b>Rik</b>        | -0.798862313 | 0.0058 |
| <b>Cd8b1</b>   | -0.711690115 | 0.0088 | <b>Lipa</b>       | -0.800189619 | 0.0100 |
| <b>Lrrc8c</b>  | -0.713941043 | 0.0067 | <b>Mob3a</b>      | -0.802463619 | 0.0002 |
| <b>Mknk2</b>   | -0.71438017  | 0.0007 | <b>Upp1</b>       | -0.807019926 | 0.0039 |
| <b>Plk2</b>    | -0.716729559 | 0.0076 | <b>Maf</b>        | -0.810529808 | 0.0006 |
| <b>Mpp1</b>    | -0.717943712 | 0.0327 | <b>Rgs10</b>      | -0.818593834 | 0.0274 |
| <b>Hcls1</b>   | -0.718113944 | 0.0032 | <b>Ppp1r18</b>    | -0.819170258 | 0.0001 |
| <b>Fam126a</b> | -0.721185924 | 0.0203 | <b>Al467606</b>   | -0.822235189 | 0.0027 |
| <b>Hdac7</b>   | -0.725636174 | 0.0077 | <b>Ech1</b>       | -0.82251202  | 0.0010 |
| <b>Tecpr1</b>  | -0.727864921 | 0.0010 | <b>Gbp2b</b>      | -0.823726097 | 0.0316 |
| <b>Rab7l1</b>  | -0.728352222 | 0.0019 | <b>Ptms</b>       | -0.826632887 | 0.0112 |
| <b>Cyp4v3</b>  | -0.728463569 | 0.0079 | <b>Kansl1l</b>    | -0.827342834 | 0.0011 |
| <b>Cyb5</b>    | -0.731900961 | 0.0012 | <b>Inpp5d</b>     | -0.831815406 | 0.0011 |
| <b>Ifi47</b>   | -0.735273585 | 0.0120 | <b>Fam134b</b>    | -0.831830112 | 0.0123 |
| <b>Prkca</b>   | -0.737917472 | 0.0146 | <b>Apobec1</b>    | -0.832189123 | 0.0175 |
| <b>Ypel3</b>   | -0.737989488 | 0.0101 | <b>Dok2</b>       | -0.834839722 | 0.0003 |
| <b>Ccdc92</b>  | -0.740171312 | 0.0035 | <b>Anxa6</b>      | -0.841781898 | 0.0015 |
| <b>Picalm</b>  | -0.740528917 | 0.0004 | <b>Cxcl2</b>      | -0.842540498 | 0.0070 |
| <b>Rnf213</b>  | -0.743504004 | 0.0038 | <b>Dhrs1</b>      | -0.843255117 | 0.0037 |
| <b>Nuak2</b>   | -0.744360011 | 0.0189 | <b>Uba7</b>       | -0.846420478 | 0.0006 |
| <b>Rin3</b>    | -0.746892211 | 0.0080 | <b>Rac2</b>       | -0.854198135 | 0.0019 |
| <b>C78339</b>  | -0.747465641 | 0.0007 | <b>Npc2</b>       | -0.875220256 | 0.0055 |
| <b>Bmp7</b>    | -0.747897474 | 0.0051 | <b>Swap70</b>     | -0.875251493 | 0.0360 |
| <b>Agpat4</b>  | -0.751347981 | 0.0002 | <b>Mmp13</b>      | -0.879650559 | 0.0005 |
|                |              |        | <b>Klf2</b>       | -0.880763631 | 0.0289 |



|                  |                     |               |
|------------------|---------------------|---------------|
| <b>Ank</b>       | <b>-0.882409732</b> | <b>0.0027</b> |
| <b>Stk32c</b>    | -0.883017082        | 0.0014        |
| <b>Abcb9</b>     | -0.884132588        | 0.0022        |
| <b>Gm4951</b>    | -0.8863652          | 0.0082        |
| <b>Slnf1</b>     | -0.891874237        | 0.0149        |
| <b>Sat1</b>      | -0.898998323        | 0.0103        |
| <b>F2r</b>       | -0.900274643        | 0.0072        |
| <b>Tdrd7</b>     | -0.903459804        | 0.0002        |
| <b>Oas1g</b>     | -0.905979159        | 0.0106        |
| <b>Gadd45a</b>   | -0.90723354         | 0.0030        |
| <b>Gbp3</b>      | -0.908435957        | 0.0065        |
| <b>Endod1</b>    | -0.922761334        | 0.0014        |
| <b>Xaf1</b>      | -0.943697141        | 0.0070        |
| <b>Hmha1</b>     | -0.944461496        | 0.0001        |
| <b>Rbms1</b>     | -0.948557565        | 0.0000        |
| <b>Igtp</b>      | -0.949839755        | 0.0002        |
| <b>Sema4a</b>    | -0.970895275        | 0.0041        |
| <b>S100a13</b>   | -0.982292821        | 0.0148        |
| <b>Spata13</b>   | -0.988544718        | 0.0016        |
| <b>Cdkn2b</b>    | -0.992484895        | 0.0055        |
| <b>Ky</b>        | -0.995461824        | 0.0000        |
| <b>Gbp5</b>      | -1.002381393        | 0.0088        |
| <b>N4bp1</b>     | -1.005486756        | 0.0000        |
| <b>Emc9</b>      | -1.00722179         | 0.0016        |
| <b>Itk</b>       | -1.010389033        | 0.0104        |
| <b>Gng2</b>      | -1.015432571        | 0.0186        |
| <b>Serpinb6a</b> | -1.016418438        | 0.0093        |
| <b>Sgms1</b>     | -1.019926255        | 0.0008        |
| <b>Gimap6</b>    | -1.020885862        | 0.0006        |
| <b>Csrp2</b>     | -1.028290796        | 0.0005        |
| <b>Il6st</b>     | -1.028351235        | 0.0092        |
| <b>Ppp1r3b</b>   | -1.048608337        | 0.0000        |
| <b>Icam1</b>     | -1.048891816        | 0.0003        |
| <b>Pea15a</b>    | -1.049359032        | 0.0006        |
| <b>Hsd11b1</b>   | -1.051909481        | 0.0032        |
| <b>Marcks</b>    | -1.054384773        | 0.0065        |
| <b>Nkg7</b>      | -1.054761587        | 0.0368        |
| <b>Syp</b>       | -1.064701299        | 0.0167        |
| <b>Camk2n1</b>   | -1.095658603        | 0.0098        |
| <b>Sgk1</b>      | -1.096984078        | 0.0034        |
| <b>Ctla4</b>     | -1.104960289        | 0.0006        |
| <b>Bcl3</b>      | -1.105714901        | 0.0059        |
| <b>Selplg</b>    | -1.108699562        | 0.0001        |

|                 |              |        |
|-----------------|--------------|--------|
| <b>Ifitm3</b>   | -1.133460529 | 0.0180 |
| <b>Tnfrsf18</b> | -1.161189574 | 0.0007 |
| <b>Pdzk1ip1</b> | -1.167085364 | 0.0367 |
| <b>Ecm1</b>     | -1.170183991 | 0.0012 |
| <b>Il13</b>     | -1.174240918 | 0.0087 |
| <b>Glipr1</b>   | -1.174447465 | 0.0003 |
| <b>Dgat1</b>    | -1.177746651 | 0.0076 |
| <b>Fam132a</b>  | -1.181717716 | 0.0021 |
| <b>Gna15</b>    | -1.184325034 | 0.0058 |
| <b>Lxn</b>      | -1.191274969 | 0.0001 |
| <b>Arhgap4</b>  | -1.20463949  | 0.0000 |
| <b>Ccl4</b>     | -1.221322256 | 0.0005 |
| <b>Gm4956</b>   | -1.223012066 | 0.0007 |
| <b>Myo1f</b>    | -1.225138307 | 0.0081 |
| <b>Gimap7</b>   | -1.228687702 | 0.0103 |
| <b>Ifngr1</b>   | -1.254746189 | 0.0035 |
| <b>Slc2a3</b>   | -1.25896302  | 0.0016 |
| <b>Arl4c</b>    | -1.262381331 | 0.0103 |
| <b>Trpv2</b>    | -1.272370057 | 0.0013 |
| <b>Zfp36</b>    | -1.292528664 | 0.0001 |
| <b>Ikzf2</b>    | -1.334553701 | 0.0138 |
| <b>Ltb4r1</b>   | -1.455145237 | 0.0005 |
| <b>Foxp1</b>    | -1.472045464 | 0.0008 |
| <b>Cd72</b>     | -1.571580275 | 0.0177 |
| <b>Isg20</b>    | -1.665804876 | 0.0002 |
| <b>Socs2</b>    | -1.79608408  | 0.0002 |
| <b>Glrx</b>     | -1.844945755 | 0.0000 |
| <b>Cytip</b>    | -1.933855188 | 0.0013 |
| <b>Snx9</b>     | -1.972830927 | 0.0007 |
| <b>Il10ra</b>   | -2.099839132 | 0.0000 |
| <b>Gpr83</b>    | -2.211314476 | 0.0000 |
| <b>Ccr5</b>     | -2.250752091 | 0.0002 |
| <b>Ncmip</b>    | -2.804431998 | 0.0001 |

| Gene        | Up/Down_T effector          |               |
|-------------|-----------------------------|---------------|
|             | log2FC<br>(KO_Teff/WT_Teff) | pvalue        |
| Prss34      | 5.172263149                 | 0.0314        |
| Mcpt8       | 4.413352029                 | 0.0164        |
| Ccl9        | 4.04151651                  | 0.0082        |
| Il6         | 3.505771403                 | 0.0221        |
| Cpa3        | 3.232991333                 | 0.0209        |
| Cyp11a1     | 3.227220802                 | 0.0155        |
| <b>Lat2</b> | <b>3.10096442</b>           | <b>0.0173</b> |
| Gja1        | 2.986859818                 | 0.0348        |
| Il1b        | 2.870422519                 | 0.0455        |
| H2-Eb1      | 2.768839733                 | 0.0263        |
| Fcer1a      | 2.766447424                 | 0.0202        |
| Aqp9        | 2.75662276                  | 0.0199        |
| Cd63        | 2.693807736                 | 0.0256        |
| Klre1       | 2.689236897                 | 0.0240        |
| Hs3st1      | 2.536952403                 | 0.0217        |
| Osr2        | 2.505617017                 | 0.0058        |
| Napsa       | 2.489581795                 | 0.0143        |
| Adora2b     | 2.474845611                 | 0.0294        |
| Klra18      | 2.43120066                  | 0.0464        |
| H2-Ab1      | 2.378837445                 | 0.0171        |
| Tgm1        | 2.369254697                 | 0.0301        |
| Pdzk1ip1    | 2.36191606                  | 0.0063        |
| H2-Aa       | 2.328800707                 | 0.0074        |
| Csf1        | 2.317876659                 | 0.0153        |
| Klra3       | 2.311397338                 | 0.0462        |
| Trf         | 2.068943646                 | 0.0314        |
| Inhba       | 2.047635797                 | 0.0444        |
| Cd83        | 2.014026276                 | 0.0157        |
| Scimp       | 2.000053962                 | 0.0404        |
| Cd74        | 1.843380308                 | 0.0128        |
| Klf5        | 1.747992377                 | 0.0489        |
| Itga2b      | 1.678158762                 | 0.0343        |
| Armxc2      | 1.598319056                 | 0.0023        |
| Cd200r3     | 1.50893154                  | 0.0240        |
| Tubb6       | 1.470263131                 | 0.0359        |
| Fndc3b      | 1.45960737                  | 0.0049        |
| Ccdc22      | 1.453768055                 | 0.0311        |
| Cd9         | 1.423679976                 | 0.0189        |
| Swap70      | 1.406612408                 | 0.0072        |
| Csf2rb2     | 1.374044556                 | 0.0114        |
| Tnfsf4      | 1.352674824                 | 0.0009        |
| Fam110c     | 1.347288324                 | 0.0331        |
| Car2        | 1.339165821                 | 0.0246        |
| Pcyt1a      | 1.321013247                 | 0.0223        |
| Cxcr4       | 1.320803523                 | 0.0024        |
| Ifitm1      | 1.317555602                 | 0.0058        |
| H2-Ca       | 1.295301791                 | 0.0121        |

| Gene           | log2FC<br>(KO_Teff/WT_Teff) |               |
|----------------|-----------------------------|---------------|
|                |                             | pvalue        |
| <b>Tacstd2</b> | <b>1.222627115</b>          | <b>0.0136</b> |
| Car13          | 1.179831358                 | 0.0272        |
| Abcd3          | 1.172626551                 | 0.0177        |
| Aqp3           | 1.138448259                 | 0.0482        |
| Cx3cl1         | 1.103867942                 | 0.0001        |
| Lrig1          | 1.102030796                 | 0.0469        |
| H2-DMb1        | 1.063444554                 | 0.0456        |
| Ppap2c         | 1.056348346                 | 0.0257        |
| Rap2a          | 1.035345158                 | 0.0170        |
| Gns            | 1.012801425                 | 0.0106        |
| Klrk1          | 1.010575951                 | 0.0273        |
| Slco2b1        | 0.998175655                 | 0.0185        |
| Cd81           | 0.990650833                 | 0.0287        |
| Nucb1          | 0.981372047                 | 0.0233        |
| Ttc7b          | 0.964754972                 | 0.0338        |
| Tax1bp1        | 0.959886663                 | 0.0257        |
| Orai3          | 0.953848719                 | 0.0091        |
| Plcg2          | 0.951444416                 | 0.0121        |
| Gpr183         | 0.922500427                 | 0.0332        |
| Gzmm           | 0.903082682                 | 0.0126        |
| Snx8           | 0.885686956                 | 0.0253        |
| Sav1           | 0.861381282                 | 0.0057        |
| Igfbp4         | 0.850449101                 | 0.0275        |
| Nt5dc2         | 0.847923369                 | 0.0222        |
| Fosl1          | 0.836776991                 | 0.0231        |
| Chpf           | 0.832768897                 | 0.0109        |
| Mkl1           | 0.832083144                 | 0.0056        |
| Prkd3          | 0.82856238                  | 0.0255        |
| Stx7           | 0.813740066                 | 0.0376        |
| Trio           | 0.805316734                 | 0.0352        |
| Cerk           | 0.795965962                 | 0.0129        |
| Myo6           | 0.7936571                   | 0.0076        |
| Ctsc           | 0.7792256                   | 0.0244        |
| Large          | 0.740962027                 | 0.0071        |
| Amd1           | 0.737331547                 | 0.0002        |
| Gaa            | 0.731173427                 | 0.0220        |
| Tcf4           | 0.73030842                  | 0.0022        |
| Tiam2          | 0.729669788                 | 0.0245        |
| Ccnd2          | 0.71645197                  | 0.0414        |
| Casz1          | 0.708629453                 | 0.0157        |
| Rps4y2         | 0.699184242                 | 0.0137        |
| Avpi1          | 0.698268597                 | 0.0241        |
| Wasf2          | 0.69211529                  | 0.0339        |

|                  |                    |               |                     |                     |               |
|------------------|--------------------|---------------|---------------------|---------------------|---------------|
| <b>Mfge8</b>     | <b>0.688784502</b> | <b>0.0130</b> | <b>St6galnac2</b>   | <b>-0.764351549</b> | <b>0.0269</b> |
| <b>Cgrrf1</b>    | 0.675455508        | 0.0041        | <b>Tmc6</b>         | -0.767018294        | 0.0071        |
| <b>Fam109a</b>   | 0.673705083        | 0.0054        | <b>Pou2f2</b>       | -0.799779423        | 0.0235        |
| <b>Sirt3</b>     | 0.664131545        | 0.0363        | <b>Ccno</b>         | -0.805836987        | 0.0271        |
| <b>Ftl1</b>      | 0.659238418        | 0.0157        | <b>Mapre2</b>       | -0.811385404        | 0.0170        |
| <b>Zfp219</b>    | 0.658278875        | 0.0077        | <b>Ccl20</b>        | -0.831443811        | 0.0372        |
| <b>Cd47</b>      | 0.658173809        | 0.0243        | <b>Il17a</b>        | -0.850382287        | 0.0042        |
| <b>Golim4</b>    | 0.653352536        | 0.0041        | <b>B4galnt4</b>     | -0.874927182        | 0.0368        |
| <b>Pgd</b>       | 0.651480541        | 0.0044        | <b>Rftn1</b>        | -0.902460468        | 0.0009        |
| <b>Cryba4</b>    | 0.633866744        | 0.0390        | <b>Il22</b>         | -0.914070842        | 0.0160        |
| <b>Prodh</b>     | 0.622760841        | 0.0146        | <b>Rnf166</b>       | -0.938472578        | 0.0163        |
| <b>Cdkn1c</b>    | 0.621242845        | 0.0100        | <b>Tmem194b</b>     | -0.94503979         | 0.0015        |
| <b>Avil</b>      | 0.61822728         | 0.0215        | <b>Zc3h12d</b>      | -0.950650273        | 0.0320        |
| <b>Vkorc1</b>    | 0.616325834        | 0.0100        | <b>Zfp862</b>       | -1.009466739        | 0.0161        |
| <b>Tmed1</b>     | 0.615861129        | 0.0270        | <b>Adam19</b>       | -1.057416873        | 0.0008        |
| <b>Dgkd</b>      | 0.613382572        | 0.0020        | <b>Ltb</b>          | -1.121609677        | 0.0272        |
| <b>2310044G1</b> |                    |               | <b>Sytl1</b>        | -1.136113676        | 0.0015        |
| <b>7Rik</b>      | 0.611226058        | 0.0479        | <b>Ubash3a</b>      | -1.172598063        | 0.0471        |
| <b>Ccl6</b>      | 0.609642631        | 0.0327        | <b>Asb2</b>         | -1.231304664        | 0.0020        |
| <b>Tuba8</b>     | 0.604274365        | 0.0349        | <b>Sit1</b>         | -1.247730618        | 0.0038        |
| <b>Plxnd1</b>    | 0.590704647        | 0.0299        | <b>Rorc</b>         | -1.336381098        | 0.0010        |
| <b>Mgat4b</b>    | 0.58871331         | 0.0017        | <b>1700012B07Ri</b> |                     |               |
| <b>Klk8</b>      | -0.593556843       | 0.0365        | <b>k</b>            | -1.54432167         | 0.0044        |
| <b>Card10</b>    | -0.596561084       | 0.0205        | <b>Snai3</b>        | -1.618890182        | 0.0091        |
| <b>Cd96</b>      | -0.596998019       | 0.0303        | <b>Gcg</b>          | -2.065497725        | 0.0473        |
| <b>Fam160a2</b>  | -0.609895783       | 0.0111        |                     |                     |               |
| <b>Cd28</b>      | -0.611667462       | 0.0049        |                     |                     |               |
| <b>Olf802</b>    | -0.615662516       | 0.0376        |                     |                     |               |
| <b>Chchd2</b>    | -0.619764359       | 0.0034        |                     |                     |               |
| <b>Slc12a7</b>   | -0.624931273       | 0.0108        |                     |                     |               |
| <b>Ccng2</b>     | -0.637040883       | 0.0051        |                     |                     |               |
| <b>Slc25a47</b>  | -0.63708513        | 0.0011        |                     |                     |               |
| <b>Cd6</b>       | -0.639403865       | 0.0132        |                     |                     |               |
| <b>Batf</b>      | -0.639688622       | 0.0303        |                     |                     |               |
| <b>Prkcq</b>     | -0.658938549       | 0.0422        |                     |                     |               |
| <b>Slc29a1</b>   | -0.684874498       | 0.0050        |                     |                     |               |
| <b>Spns1</b>     | -0.684997284       | 0.0338        |                     |                     |               |
| <b>Slc25a19</b>  | -0.685921291       | 0.0039        |                     |                     |               |
| <b>Slamf1</b>    | -0.717853123       | 0.0470        |                     |                     |               |
| <b>Amn</b>       | -0.725268584       | 0.0095        |                     |                     |               |
| <b>Tiam1</b>     | -0.731739745       | 0.0044        |                     |                     |               |
| <b>Il12rb1</b>   | -0.738136652       | 0.0486        |                     |                     |               |
| <b>Ext1</b>      | -0.743630571       | 0.0082        |                     |                     |               |
| <b>Bcl11b</b>    | -0.75581781        | 0.0416        |                     |                     |               |

| Gene              |                                   |        |
|-------------------|-----------------------------------|--------|
|                   | log2FC<br>(KO_pTreg/WT_pT<br>reg) | pvalue |
| Lif               | 2.435714619                       | 0.0007 |
| Slc2a6            | 2.727399534                       | 0.0000 |
| Tgm2              | 1.313851509                       | 0.0234 |
| Prdm1             | 1.587528301                       | 0.0001 |
| Batf3             | 2.416833906                       | 0.0007 |
| Dennd3            | 0.766024008                       | 0.0100 |
| Synpo             | 1.55167614                        | 0.0001 |
| Lhfp12            | 1.743330727                       | 0.0056 |
| Pecam1            | 0.656640532                       | 0.0259 |
| Bcl6              | 1.796873568                       | 0.0001 |
| 1700025G04Rik     | 1.553317849                       | 0.0003 |
| Maged2            | 1.720901061                       | 0.0008 |
| Vcl               | 0.721689183                       | 0.0268 |
| Flnb              | 0.980864799                       | 0.0002 |
| D930015E06Rik     | 0.800969652                       | 0.0027 |
| Tagap             | 1.094227684                       | 0.0062 |
| Tox               | 1.068661756                       | 0.0069 |
| Hspa2             | 0.737391271                       | 0.0142 |
| Anxa2             | 0.64288339                        | 0.0074 |
| Ly6g5b            | -0.725726242                      | 0.0004 |
| Fam102a           | -0.628043794                      | 0.0145 |
| Pkp3              | -0.802461518                      | 0.0013 |
| Trib2             | -0.652171265                      | 0.0029 |
| Grap2             | -0.664435542                      | 0.0003 |
| Rasl11a           | -0.93158291                       | 0.0033 |
| BC021614          | -0.930663925                      | 0.0040 |
| Malt1             | -0.893780483                      | 0.0161 |
| Lat               | -0.665501591                      | 0.0030 |
| Cd5               | -0.636784791                      | 0.0003 |
| Cpd               | -0.903755402                      | 0.0265 |
| Stambpl1          | -1.075625487                      | 0.0009 |
| Rab27a            | -1.134068221                      | 0.0003 |
| Ckb               | -1.130171493                      | 0.0029 |
| Notch1            | -1.00169425                       | 0.0028 |
| A430093F15R<br>ik | -1.199290105                      | 0.0001 |
| Tmem154           | -1.245325106                      | 0.0038 |
| Il10              | -5.199474885                      | 0.0000 |
